# Supplementary material for: Adsorption characteristics of dichloromethane-ethyl acetate/toluene vapor on a hypercrosslinked polystyrene adsorbent
Source: Royal Society of Chemistry journal article supplement (doi:10.1039/d3ra01754k), 2023-01-01
Supplement: d3ra01754k1.pdf [file d3ra01754k1.pdf]

## Supporting Information

### Adsorption characteristics of dichloromethane-ethyl acetate/toluene vapor on a hypercrosslinked polystyrene adsorbent

Yanbing Cao<sup>a,b</sup>, Xiaoqi Fei<sup>a,c,d</sup>, Xuanhao Wu<sup>a,b</sup>, Haiqiang Wang<sup>\*a,b</sup>, Zhongbiao Wu<sup>a,b</sup>

<sup>a</sup> Key Laboratory of Environment Remediation and Ecological Health, Ministry of Education, College of Environmental Resources Science, Zhejiang University, Hangzhou 310058, P.R. China.

<sup>b</sup> Zhejiang Tianlan Environmental Protection Technology Co., Ltd., Zhejiang Provincial Engineering Research Center of Industrial Boiler Furnace Flue Gas Pollution Control, Hangzhou 310058, PR China

<sup>c</sup> Zhejiang Academy of Special Equipment Science, Hangzhou 310020, Peoples R China

<sup>d</sup> Key Laboratory of Special Equipment Safety Testing Technology of Zhejiang Province, Hangzhou 310020, Peoples R China

---

\* Corresponding author:

(H. Wang) E-mail: haiqiangwang@zju.edu.cn; Tel. / Fax: +86-571-87953088.

Full postal address: Key Laboratory of Environment Remediation and Ecological Health, Ministry of Education, College of Environmental & Resources Science, Zhejiang University, Hangzhou 310058, P.R. China.

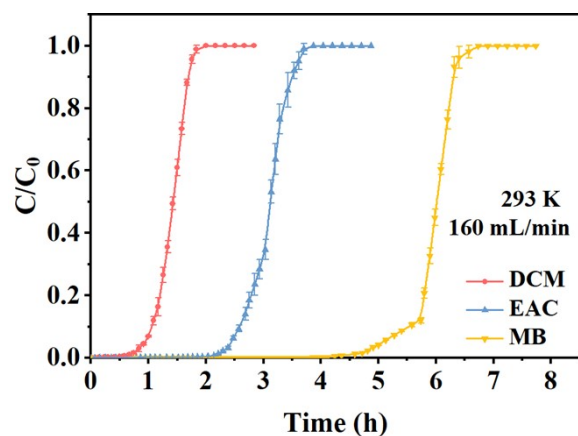

**Figure S1.** Breakthrough curves in the single vapor system on NDA-88.

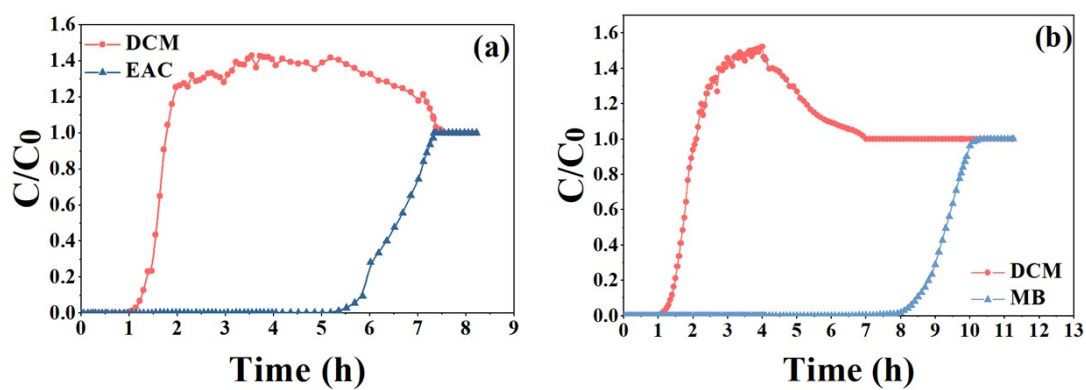

**Figure S2.** Breakthrough curves in the binary vapor system composed of the same initial concentration of (a) DCM and EAC, (b) DCM and MB on NDA-88.

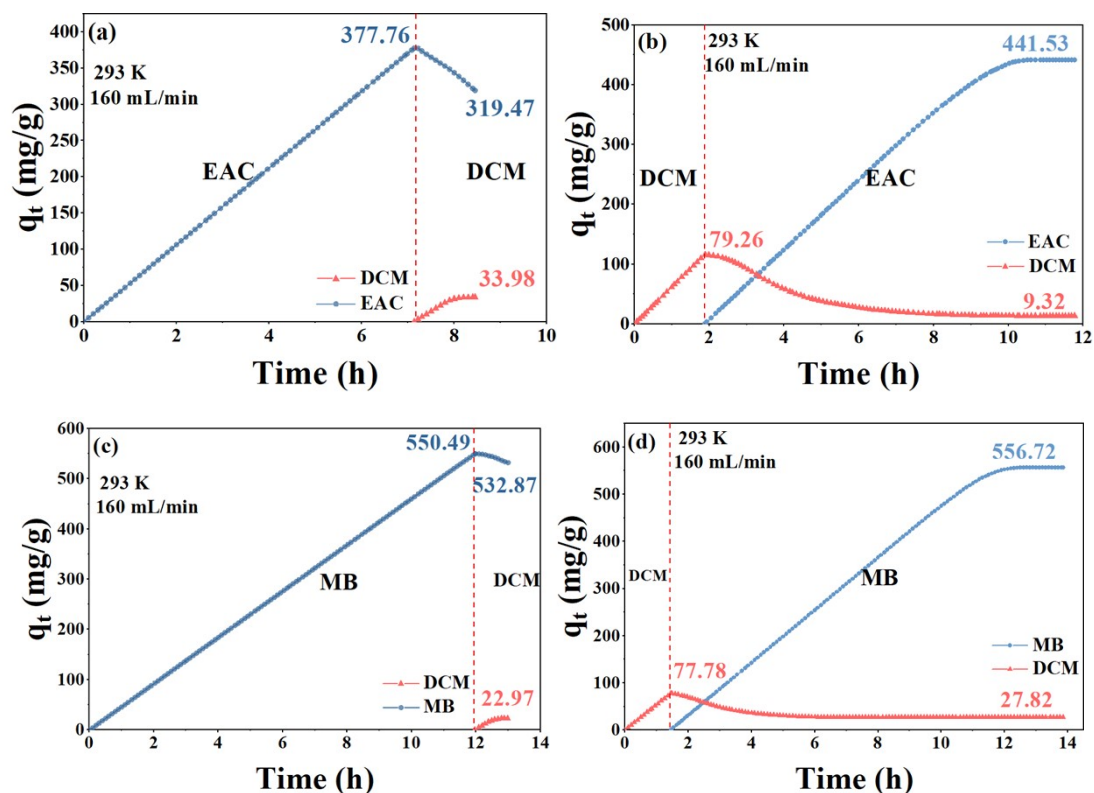

**Figure S3.** Plots of the quantity of VOCs adsorbed ( $q_t$ ) versus time (t). (a) EAC first and then DCM, (b) DCM first and then EAC, (c) MB first and then DCM, (d) DCM first and then MB.

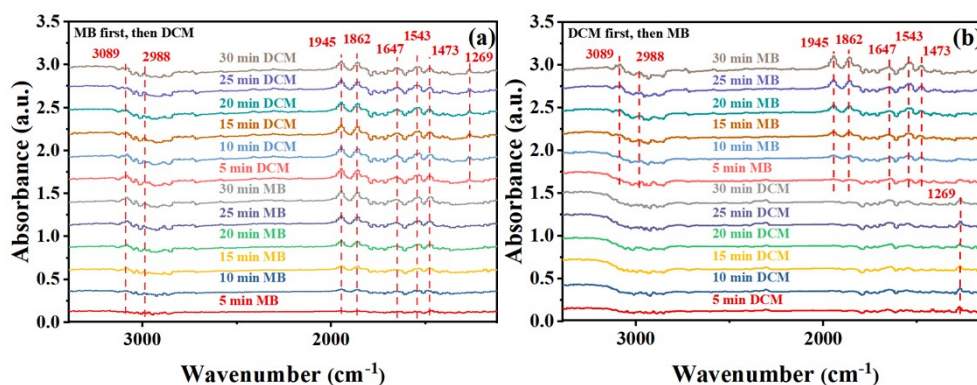

**Figure S4.** In situ FTIR spectra of (a) MB followed by DCM, (b) DCM followed by MB for the adsorption process on NDA-88.

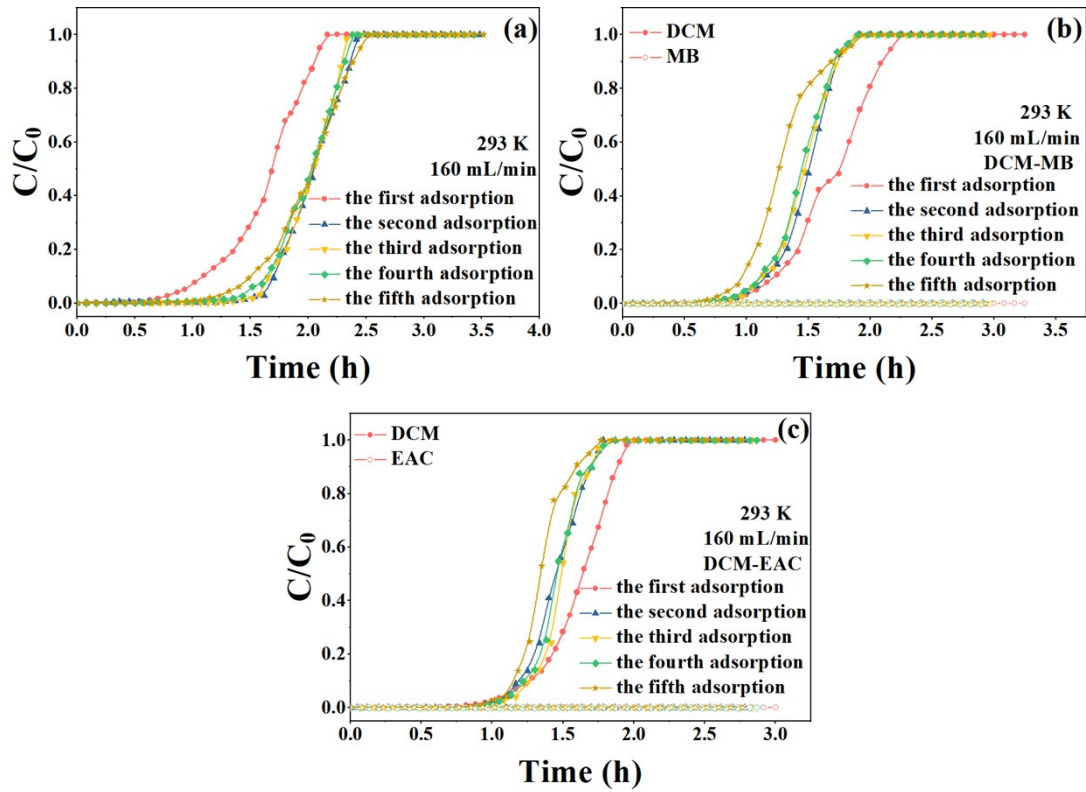

**Figure S5.** Breakthrough curves in NDA-88 regeneration experiments. (a) DCM, (b) DCM-MB, (c) DCM-EAC.

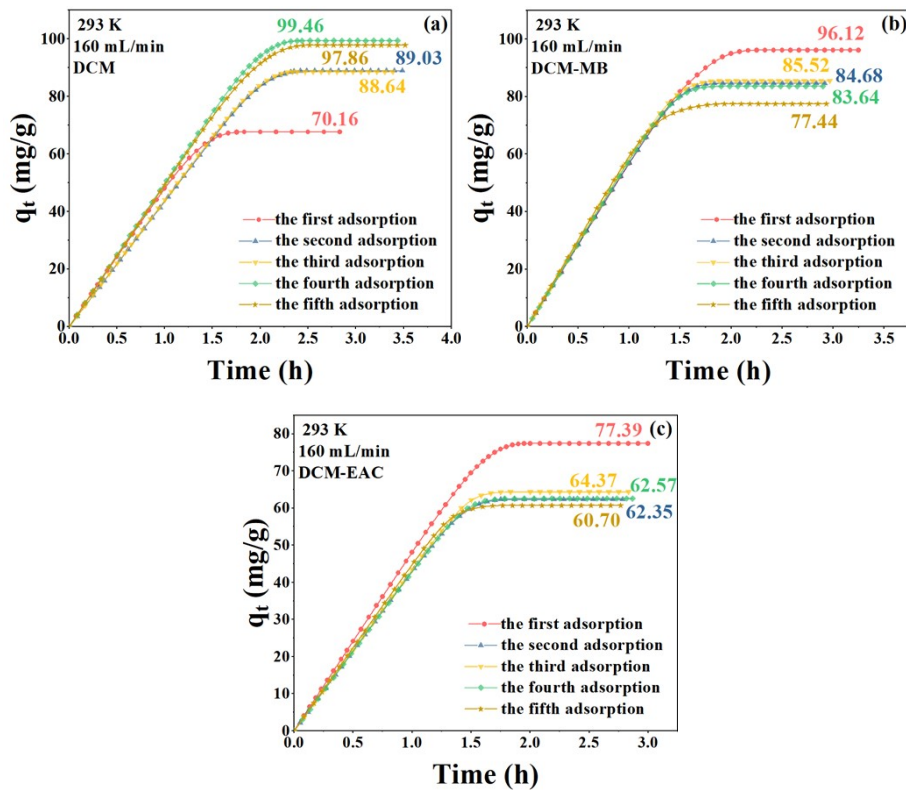

**Figure S6.** Plots of adsorption quantity vs. time of DCM in NDA-88 regeneration experiments. (a) DCM, (b) DCM-MB, (c) DCM-EAC.

**Table S1****Saturation sorption of VOCs at different initial concentrations.**

| $C_0(\text{DCM}):C_0(\text{EAC/MB})$ | Relative humidity | VOCs | Saturated adsorption capacity (mg/g) |
|--------------------------------------|-------------------|------|--------------------------------------|
| 6.68:1                               | 0                 | EAC  | 21.68                                |
| 10.37:1                              | 20%               | EAC  | 12.28                                |
| 8.62:1                               | 40%               | EAC  | 16.04                                |
| 9.69:1                               | 50%               | EAC  | 13.69                                |
| 8.01:1                               | 0                 | MB   | 23.16                                |
| 7.20:1                               | 20%               | MB   | 13.01                                |
| 8.99:1                               | 40%               | MB   | 10.32                                |
| 7.99:1                               | 50%               | MB   | 11.88                                |
